# Supplementary material for: The effect of carboxylic acids on glycine polymorphism, salt and co-crystal formation. A comparison of different crystallisation techniques
Source: Royal Society of Chemistry journal article supplement (doi:10.1039/c3nj41169a), 2013-01-01
Supplement: c3nj41169a.pdf [file c3nj41169a.pdf]

# The effect of carboxylic acids on glycine polymorphism, salt and co-crystal formation. A comparison of different crystallisation techniques.

Evgeniy A. Losev,<sup>\*a,b</sup> Mikhail A. Mikhailenko,<sup>a,b</sup> Andrey F. Achkasov<sup>b</sup> and Elena V. Boldyreva<sup>\*a,b</sup>

## Supplementary materials

### 1. Viscosities\* of solvents used

| Solvent       | Viscosity (cP) |
|---------------|----------------|
| Acetone       | 0,36           |
| Ethyl alcohol | 1,1            |
| THF           | 0,55           |
| 1,4-dioxane   | 1,37           |

\* <http://macro.lsu.edu/HowTo/solvents/viscosity.htm>

We suppose that the differences in viscosities is not of great importance as compared to differences of miscibility of this solvents with glycine water solution.

### 2. The results of experiments on anti-solvent presipitation of water solutions with stoichiometric amounts of $\alpha$ -glycine and carboxylic acids.

#### 2.1 Acetone as antisolvent

##### 1 run

| Dicarboxylic acid       | Products                      |         |          |                              |
|-------------------------|-------------------------------|---------|----------|------------------------------|
|                         | The polymorphs of glycine (%) |         |          | Salt                         |
|                         | $\alpha$                      | $\beta$ | $\gamma$ |                              |
| Oxalic acid (dihydrate) | -                             | -       | 15       | bis(Glycinium) oxalate - 85% |
| Malonic acid            | -                             | 95      | 5        | -                            |
| Succinic acid           | 20                            | 80      | -        | -                            |
| Maleic acid             | -                             | 100     | -        | -                            |
| Glutaric acid           | 33                            | 67      | -        | -                            |
| L-malic acid            | -                             | 100     | -        | -                            |

##### 2 run

| Dicarboxylic acid       | Products                      |         |          |                              |
|-------------------------|-------------------------------|---------|----------|------------------------------|
|                         | The polymorphs of glycine (%) |         |          | Salt                         |
|                         | $\alpha$                      | $\beta$ | $\gamma$ |                              |
| Oxalic acid (dihydrate) | -                             | -       | 68       | bis(Glycinium) oxalate — 32% |
| Malonic acid            | -                             | 100     | -        | -                            |
| Succinic acid           | -                             | 100     | -        | -                            |
| Maleic acid             | -                             | 100     | -        | -                            |
| Glutaric acid           | 100                           | -       | -        | -                            |
| L-malic acid            | -                             | 100     | -        | -                            |

##### 3 run

| Dicarboxylic acid       | Products                      |         |          |                               |
|-------------------------|-------------------------------|---------|----------|-------------------------------|
|                         | The polymorphs of glycine (%) |         |          | Salt                          |
|                         | $\alpha$                      | $\beta$ | $\gamma$ |                               |
| Oxalic acid (dihydrate) | -                             | -       | -        | bis(Glycinium) oxalate — 100% |
| Malonic acid            | -                             | 16      | 84       | -                             |
| Succinic acid           | 1                             | 99      | -        | -                             |
| Maleic acid             | -                             | 99      | 1        | -                             |
| Glutaric acid           | 10                            | 90      | -        | -                             |
| L-malic acid            | -                             | 100     | -        | -                             |

## 2.2 THF as antisolvent

1 run

|                         | Products                      |         |          |                               |
|-------------------------|-------------------------------|---------|----------|-------------------------------|
| Dicarboxylic acid       | The polymorphs of glycine (%) |         |          | Salt                          |
|                         | $\alpha$                      | $\beta$ | $\gamma$ |                               |
| Oxalic acid (dihydrate) | -                             | -       | -        | bis(Glycinium) oxalate - 100% |
| Malonic acid            | -                             | -       | 100      | -                             |
| Succinic acid           | 100                           | -       | -        | -                             |
| Maleic acid             | 100                           | -       | -        | -                             |
| Glutaric acid           | 100                           | -       | -        | -                             |
| L-malic acid            | 30                            | -       | 70       | -                             |

2 run

|                         | Products                      |         |          |                              |
|-------------------------|-------------------------------|---------|----------|------------------------------|
| Dicarboxylic acid       | The polymorphs of glycine (%) |         |          | Salt                         |
|                         | $\alpha$                      | $\beta$ | $\gamma$ |                              |
| Oxalic acid (dihydrate) | -                             | -       | 85       | bis(Glycinium) oxalate — 15% |
| Malonic acid            | 1                             | 99      | -        | -                            |
| Succinic acid           | 1                             | 99      | -        | -                            |
| Maleic acid             | -                             | 100     | -        | -                            |
| Glutaric acid           | -                             | 100     | -        | -                            |
| L-malic acid            | -                             | 100     | -        | -                            |

3 run

|                         | Products                      |         |          |                              |
|-------------------------|-------------------------------|---------|----------|------------------------------|
| Dicarboxylic acid       | The polymorphs of glycine (%) |         |          | Salt                         |
|                         | $\alpha$                      | $\beta$ | $\gamma$ |                              |
| Oxalic acid (dihydrate) | -                             | -       | 70       | bis(Glycinium) oxalate — 30% |
| Malonic acid            | 40                            | 60      | -        | -                            |
| Succinic acid           | 5                             | 95      | -        | -                            |
| Maleic acid             | 1                             | 99      | -        | -                            |
| Glutaric acid           | 14                            | 86      | -        | -                            |
| L-malic acid            | 1                             | 99      | -        | -                            |

## 3. pH values of the solutions

Typical pH measured in freshly prepared glycine water solutions with 1-40 percent adding of carboxylic acid

| Carboxylic acid | pH        |
|-----------------|-----------|
| Oxalic          | 4.2 — 2.0 |
| Malonic         | 4.6 — 2.8 |
| Maleic          | 4.6 — 2.4 |
| L-malic         | 4.6 — 3.0 |
| Glutaric        | 4.7 — 3.5 |

Any amounts of glutaric acid didn't lead to crystallisation of  $\gamma$ -glycine regardless the identical pH values compared to other carboxylic acids.

As an extra experiment we prepare glycine water solutions with 5 and 10 molar percent of hydrochloric acid resulting in crystallisation of mixtures of  $\alpha$ - and  $\gamma$ -glycine in the case of 5 percent addition (respective pH was about 3.5) and crystallisation of  $\gamma$ -glycine when 10 percent added (respective pH was about 3.3).
